# Supplementary material for: Exploring the Oxidation of Lignin-Derived Phenols by a Library of Laccase Mutants
Source: MDPI journal article supplement (doi:10.3390/molecules200915929), 2015-09-02
Supplement: s1 [file s1]

# Supplementary Materials

|                                                               |     |
|---------------------------------------------------------------|-----|
| SIGPVADLTISNGAVSPDGFSRQAILVNDVFPSPPLITGNKGDRFQLNVIDNMTNHTMLKS | 60  |
| TSIHWHGFFQHGNTWADGPAFVNQCPISTGHAFLYDFQVPDQAGTFWYHSHLSTQYCDGL  | 120 |
| RGPIVVYDPQDPHKSLYDVDDDSTVITLADWYHLAAKVGPAPPTADATLINGLGRSINTL  | 180 |
| NADLAVITVTKGKRYRFRVLVSLSCDPNYTFSIDGHSLTVIEADGVNLKPQTVDSIQIFPA | 240 |
| QRYSFVLNADQDQVDNYWIRALPNSGTRNFDGGVNSAILRYEGAAPVEPTTTQTPSTQPLV | 300 |
| ESALTTLEGTAAPGNPTPGGVDLALNMAFGFAGGRFTINGASFTPPTVPVLLQILSGAQS  | 360 |
| AQDLLPSGSVYSLPANADIEISLPATSAAPGFPHPFHLHGHTFAVVRSAQSSTYNYANPV  | 420 |
| YRDVNTGSPGDNVTIRFRTDNPGPWFLHCHIDFHLDAGFAVMAEDTPDTKAANPVPQA    | 480 |
| <u>WSDLCPYDALDPSDL</u>                                        | 496 |

**Figure S1.** Amino acid sequence of chimeric 3A4 laccase used as parent type in this work. Sequence inherited from PcL evolved variant during chimeragenesis is underlined (residues 457–496), while the rest corresponds to PM1-L evolved variant. Copper coordinating residues are highlighted in cyan. Mutated residues located at the substrate binding pocket are shown in magenta.

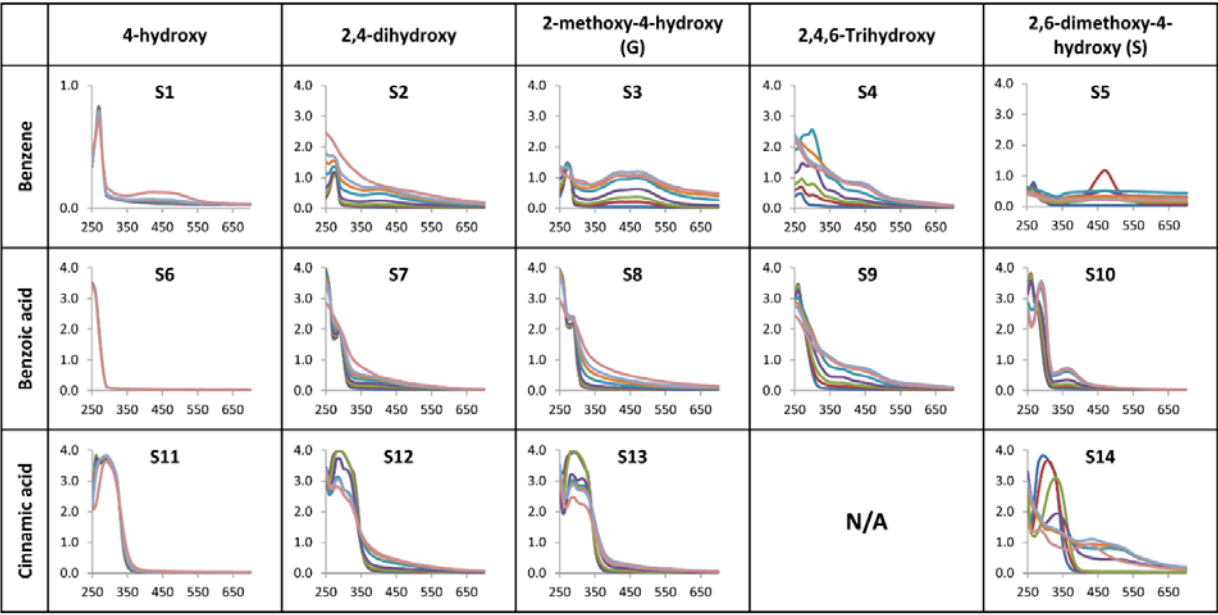

**Figure S2.** *Cont.*

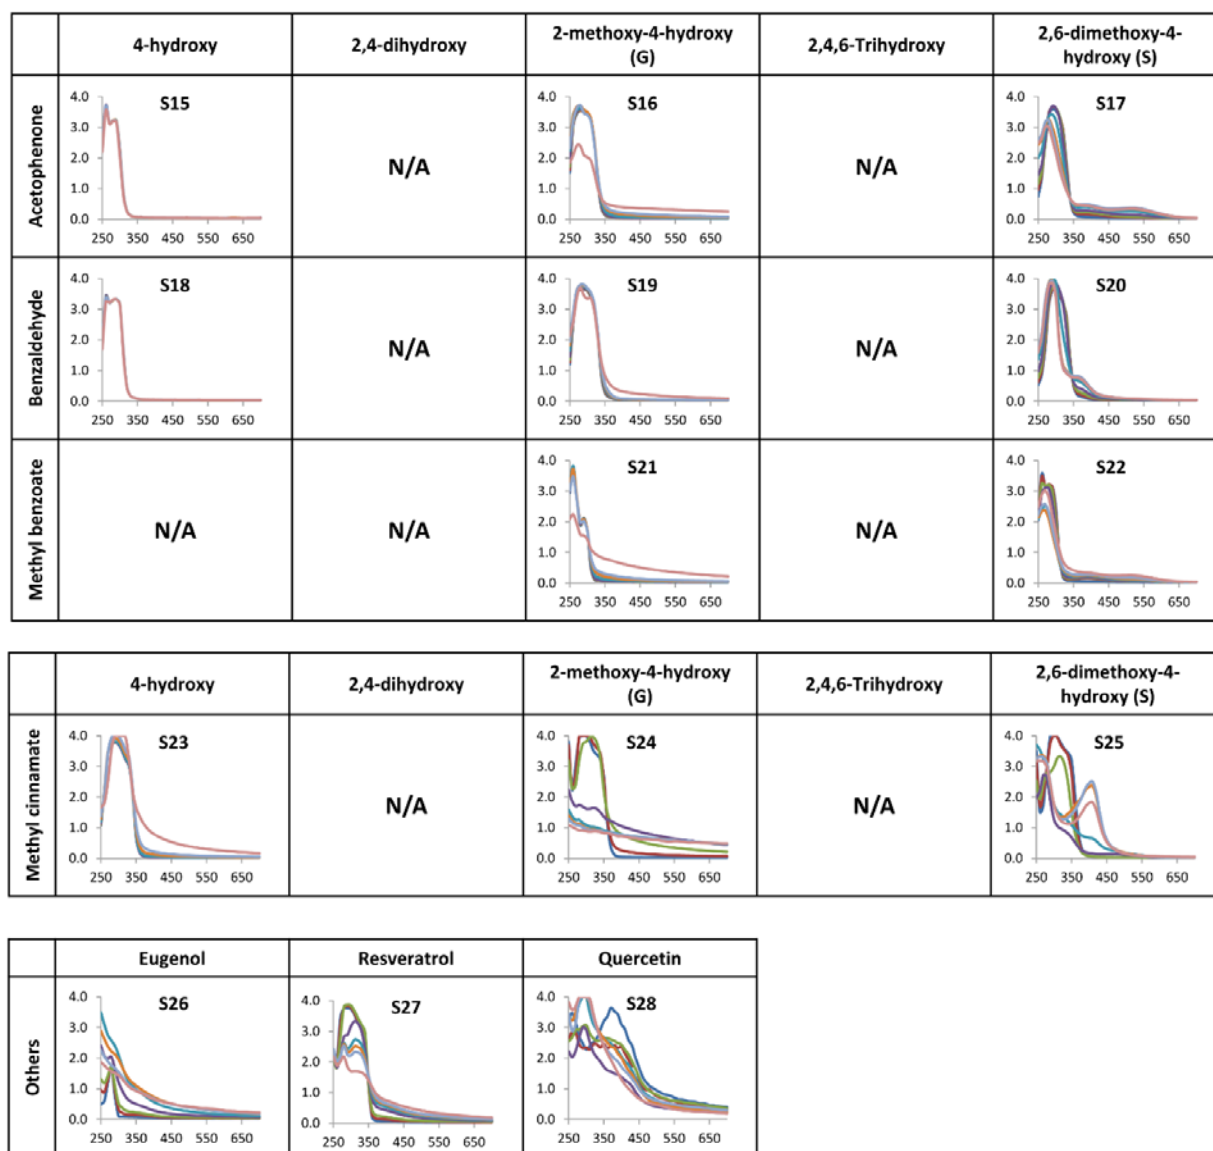

**Figure S2.** Changes in UV-Vis absorption spectra of the different phenols upon oxidation by laccase. Spectra shown correspond to initial time (**blue**), 30 min (**red**), 1 h (**green**), 2 h (**purple**), 4 h (**cyan**), 6 h (**orange**), 8 h (**light blue**) and 24 h (**pink**).
